# Supplementary material for: Global modeling of fungal spores with the EMAC chemistryclimate model: uncertainties in emission parametrizations and observations
Source: Copernicus journal article supplement (doi:10.5194/acp-2019-251), 2019-04-17
Supplement: Supplementary file 1 [file acp-2019-251-supplement.pdf]

## Supplementary Information

**Table SI1. Bacterial emission fluxes (best-fit) estimated by Burrows et al. (2009a).**

| <b>Ecosystem</b> | <b>Best-fit <math>F_i</math> (<math>m^{-2}s^{-1}</math>)</b> |
|------------------|--------------------------------------------------------------|
| Coastal          | 900                                                          |
| Crops            | 700                                                          |
| Deserts          | 0                                                            |
| Forests          | 0                                                            |
| Grasslands       | 648                                                          |
| Land-Ice         | 0                                                            |
| Sea              | 0                                                            |
| Shrubs           | 502                                                          |
| Tundra           | 0                                                            |
| Wetlands         | 196                                                          |

Bacterial emission fluxes are calculated using the best-estimate values from (Burrows et al., 2009) for different ecosystems, which were optimized toward overall agreement with observation-based near-surface number concentrations (see Table SI1). We used the MODIS International Global Biosphere Program (IGBP) global land cover classification to determine the spatial distribution of 18 different ecosystems. We lumped the categories defined in the MODIS classifications to match similar sets of lumped ecosystems used by (Burrows et al., 2009) (i.e., derived from the Olson ecosystem types), with the exception of the “urban” ecosystem, which is only present in MODIS data. We used a geometric mean diameter for bacteria of 4  $\mu m$  for continental sources (forests, shrubs, grasslands, wetlands, savannahs and urban ecosystems) and 2.4  $\mu m$  for marine sources. These choices are based on values reported for the count median diameter of bacteria-carrying particles, which may include bacteria borne by larger particles such as dust and leaf litter and/or clumps of bacteria (Shaffer and Lighthart, 1997; Tong and Lighthart, 2000, 1999; Wang et al., 2007).

**Table SI2: List of the fungal spores counts (in m<sup>-3</sup>)**

| Reference | LON     | LAT    | ALT  | startdate  | enddate    | Mean  | Min   | Max   | Reference                     |
|-----------|---------|--------|------|------------|------------|-------|-------|-------|-------------------------------|
| AM05      | 2,95    | 45,76  | 1465 | 04.03.2003 | 06.03.2003 | 222   | 53    | 390   | (Amato et al., 2005)          |
| BA02      | 15,76   | 47,71  | 1644 | 01.03.2000 | 30.03.2000 | 773   | 104   | 2031  | (Bauer et al., 2002)          |
| BE85      | 6,6     | 53,16  | 5    | 01.01.1981 | 31.12.1983 | 258   | 42    | 1225  | (Beaumont et al., 1985)       |
| CO08      | -73,75  | 45,46  | 0    | 16.10.2002 | 16.10.2002 | 615   | 492   | 738   | (Côté et al., 2008)           |
| DA63_1    | -0,11   | 51,5   | 64   | 01.06.1961 | 31.10.1961 | 7500  | 2000  | 13000 | (Davies et al., 1963)         |
| DA63_2    | -2,98   | 53,4   | 92   | 01.06.1961 | 31.10.1961 | 9000  | 3000  | 15000 | (Davies et al., 1963)         |
| DIG96     | 5,36    | 43,28  | 0    | 01.01.1962 | 31.12.1962 | 69    | 3     | 411   | (Di Giorgio et al., 1996)     |
| EL07      | -59,4   | -1,91  | 174  | 21.07.2001 | 21.07.2001 | 12476 | 4764  | 20188 | (Elbert et al., 2007)         |
| FI90      | 14,41   | 50,08  | 0    | 01.10.1988 | 15.12.1988 | 17    | NA    | NA    | (Fišar et al., 1990)          |
| DR66      | 7,63    | 11,18  | 690  | 01.07.1959 | 30.07.1959 | 128   | 20    | 237   | (Dransfield, 1966)            |
| GON10     | -46,63  | -23,55 | 0    | 01.03.2007 | 31.03.2007 | 3768  | NA    | NA    | (Goncalves et al., 2010)      |
| BARD13    | -5,36   | 35,56  | 250  | 01.01.2009 | 31.12.2012 | 1434  | 177   | 12082 | (Bardei et al., 2013)         |
| KAS_1     | 22      | 50,03  | 0    | 01.01.2001 | 31.12.2002 | 2163  | NA    | NA    | (Kasprzyk and Worek, 2006)    |
| KAS_2     | 22,08   | 50,03  | 0    | 01.04.2001 | 31.12.2002 | 2119  | NA    | NA    | (Kasprzyk and Worek, 2006)    |
| MA01_1    | 18,8    | 54,6   | 0    | 01.01.1998 | 31.03.1998 | 105   | 0     | 1000  | (Marks et al., 2001)          |
| MA01_2    | 18,8    | 54,6   | 0    | 01.07.1998 | 30.09.1998 | 223   | 0     | 600   | (Marks et al., 2001)          |
| MA01_3    | 18,85   | 54,52  | 0    | 02.08.1995 | 17.09.1995 | 19    | 0     | 122   | (Marks et al., 2001)          |
| OLI09_1   | -8,38   | 41,51  | 5    | 01.01.2005 | 31.12.2007 | 934   | NA    | NA    | (Oliveira et al., 2009)       |
| OLI09_2   | -8,65   | 41,18  | 20   | 01.01.2005 | 31.12.2007 | 531   | NA    | NA    | (Oliveira et al., 2009)       |
| RO05_2    | -7,85   | 42,33  | 0    | 01.01.2002 | 31.12.2002 | 964   | NA    | NA    | (Rodríguez-Rajo et al., 2005) |
| GRIF_01   | -64,73  | 18,33  | 0    | 01.07.2000 | 30.07.2000 | 45    | 30    | 60    | (Griffin et al., 2001)        |
| GRIF_03   | -64,79  | 18,33  | 0    | 18.07.2000 | 08.08.2001 | 21,24 | 18,25 | 61    | (Griffin et al., 2003)        |
| GRIF_07   | 34,25   | 36,6   | 0    | 18.03.2002 | 22.10.2002 | 1702  | 100   | 8510  | (Griffin et al., 2007)        |
| LAU06     | 114,26  | 22,33  | 0    | 01.09.2002 | 30.04.2003 | 269,5 | 28,5  | 1963  | (Lau et al., 2006)            |
| KAT97     | -104,86 | 39,75  | 0    | 01.01.1987 | 31.12.1995 | 409   | NA    | NA    | (Katia et al., 1997)          |
| PAD57_1   | -96,56  | 39,18  | 0    | 01.04.1953 | 30.10.1953 | 24499 | 837   | 48162 | (Pady, 1957)                  |
| PAD57_2   | -96,56  | 39,18  | 0    | 01.12.1953 | 30.03.1954 | 715   | 170   | 1261  | (Pady, 1957)                  |
| LEV06     | -95,93  | 36,11  | 0    | 01.01.2002 | 31.12.2002 | 24121 | 53    | 48188 | (Levetin and Dorsey, 2006)    |
| MAL10_1   | -57,95  | -34,91 | 15   | 01.07.2000 | 15.09.2000 | 284   | NA    | 2000  | (Mallo et al., 2010)          |
| MAL10_2   | -57,95  | -34,91 | 15   | 15.09.2000 | 15.12.2000 | 395   | NA    | 2000  | (Mallo et al., 2010)          |
| MAL10_3   | -57,95  | -34,91 | 15   | 15.12.2000 | 15.03.2001 | 814   | NA    | 3478  | (Mallo et al., 2010)          |
| MAL10_4   | -57,95  | -34,91 | 15   | 15.03.2001 | 30.06.2001 | 715   | NA    | 4763  | (Mallo et al., 2010)          |
| SAB00     | -3,58   | 37,18  | 0    | 01.01.1994 | 31.12.1994 | 832   | NA    | NA    | (Sabariego et al., 2000)      |
| SAK03     | 32,86   | 39,93  | 15   | 01.01.1990 | 31.12.1990 | 2917  | 17    | 5817  | (Şakiyan and Inceoğlu, 2003)  |
| HAM59     | -0,35   | 51,81  | 0    | 04.05.1954 | 30.09.1954 | 11500 | 6400  | 10000 | (Hamilton, 1959)              |

|       |        |       |    |            |            |       |      |       |                                   |
|-------|--------|-------|----|------------|------------|-------|------|-------|-----------------------------------|
| WU07  | 121,1  | 25,05 | 0  | 01.03.2003 | 31.12.2004 | 2255  | NA   | NA    | (Wu et al., 2007)                 |
| WU04  | 120,2  | 23    | 0  | 01.12.2000 | 30.04.2001 | 28683 | NA   | NA    | (Wu et al., 2004)                 |
| KE04  | -8     | 12,65 | 0  | 01.02.2001 | 31.03.2001 | 225   | 80   | 370   | (Kellogg et al., 2004)            |
| CHO97 | 127,38 | 36,35 | 0  | 01.01.1995 | 31.12.1995 | 3014  | 100  | 5929  | (Choi et al., 1999)               |
| HO15  | 121,6  | 23,96 | 0  | 01.04.1993 | 31.03.1996 | 4839  | NA   | NA    | (Ho et al., 2005)                 |
| AB14  | 36,1   | 32,01 | 0  | 01.12.2008 | 30.09.2009 | 7541  | 3066 | 12017 | (Abu-Dieyeh et al., 2010)         |
| PY14  | 23,71  | 37,98 | 30 | 01.01.1998 | 31.12.2001 | 1055  | 60   | 6328  | (Pyrri and Kapsanaki-Gotsi, 2015) |
| RO90  | -99,18 | 19,31 | 0  | 01.08.1988 | 28.02.1989 | 351   | 45   | 3195  | (Rosas et al., 1990)              |
| EL13  | -0,98  | 37,6  | 0  | 01.01.1994 | 31.12.1999 | 655   | 10   | 1301  | (Elvira-Rendueles et al., 2013)   |
| HAS12 | 67     | 24,85 | 0  | 01.01.2010 | 31.12.2010 | 310   | 157  | 469   | (Hasnain et al., 2012)            |
| HE06  | -3,75  | 40,45 | 0  | 01.01.2003 | 31.12.2003 | 609   | 166  | 1614  | (Herrero et al., 2006)            |
| WI09  | 16,36  | 48,2  | 0  | 01.01.2002 | 31.12.2002 | 49    | NA   | NA    | (Winiwarter et al., 2009)         |
| ABD12 | 31,55  | 29,86 | 0  | 01.01.2006 | 29.02.2007 | 216   | 101  | 331   | (Abdel Hameed et al., 2012)       |
| HU05  | 116,38 | 39,91 | 0  | 01.06.2003 | 30.05.2004 | 1164  | 23   | 13959 | (Fang et al., 2005)               |
| ZHA00 | 118,76 | 32,05 | 0  | 21.03.1998 | 14.07.1998 | 655   | NA   | NA    | (Zhai et al., 2000)               |
| HU94  | 123,06 | 41,13 | 0  | 01.12.1990 | 30.11.1991 | 1797  | NA   | NA    | (Hu et al., 1994)                 |
| JO83  | -77,33 | 39,23 | 0  | 01.09.1978 | 01.12.1980 | 695   | 4    | 6885  | (Jones and Harrison, 2004)        |
| KA10  | 27,41  | 38,61 | 74 | 01.01.2004 | 31.12.2005 | 541   | 415  | 780   | (Kalyoncu, 2010)                  |
| AD03  | 88,16  | 22,66 | 10 | 01.10.1996 | 30.09.1998 | 879   | 119  | 1639  | (Adhikari et al., 2004)           |

Abdel Hameed, A. A., Khoder, M. I., Ibrahim, Y. H., Saeed, Y., Osman, M. E., and Ghanem, S.: Study on some factors affecting survivability of airborne fungi, *Sci Total Environ*, 414, 696-700, 2012.

Abu-Dieyeh, M. H., Barham, R., Abu-Elteen, K., Al-Rashidi, R., and Shaheen, I.: Seasonal variation of fungal spore populations in the atmosphere of Zarqa area, Jordan, *Aerobiologia*, 26, 263-276, 2010.

Adhikari, A., Sen, M. M., Gupta-Bhattacharya, S., and Chanda, S.: Airborne viable, non-viable, and allergenic fungi in a rural agricultural area of India: a 2-year study at five outdoor sampling stations, *Sci Total Environ*, 326, 123-141, 2004.

Amato, P., Ménager, M., Sancelme, M., Laj, P., Mailhot, G., and Delort, A. M.: Microbial population in cloud water at the Puy de Dôme: Implications for the chemistry of clouds, *Atmospheric Environment*, 39, 4143-4153, 2005.

Bardei, F., Bouziane, H., Trigo Perez, M. M., Ajouray, N., El Haskouri, F., Filali Ben Sidel, F., Abiri, R., Kadiri, M., Kazzaz, M., and Riadi, H.: Incidence des spores fongiques de l'air de Tétouan (NW du Maroc) et influence des paramètres météorologiques, *Revue Française d'Allergologie*, 53, 576-584, 2013.

Bauer, H., Kasper-Giebl, A., Löflund, M., Giebl, H., Hitznerberger, R., Zibuschka, F., and Puxbaum, H.: The contribution of bacteria and fungal spores to the organic carbon content of cloud water, precipitation and aerosols, *Atmos Res*, 64, 109-119, 2002.

Beaumont, F., Kauffman, H. F., van Der Mark, T. H., Sluiter, H. J., and de Vries, K.: Volumetric aerobiological survey of conidial fungi in the North-East Netherlands. I. Seasonal patterns and the influence of meteorological variables, *Allergy: European Journal of Allergy and Clinical Immunology*, 40, 173-180, 1985.

Choi, Y. W., Hyde, K. D., and Ho, W. H.: Single spore isolation of fungi, *Fungal Diversity* 3, 29-38, 1999.

Côté, V., Kos, G., Mortazavi, R., and Ariya, P. A.: Microbial and "de novo" transformation of dicarboxylic acids by three airborne fungi, *Science of the Total Environment*, 390, 530-537, 2008.

Davies, R. R., Denny, M. J., and Newton, L. M.: A comparison between the summer and autumn air-sporas at London and Liverpool, *Allergy*, 18, 131-147, 1963.

Di Giorgio, C., Krempff, A., Guiraud, H., Binder, P., Tiret, C., and Dumenil, G.: Atmospheric pollution by airborne microorganisms in the city of Marseilles, *Atmospheric Environment*, 30, 155-160, 1996.

Dransfield, M.: The fungal air-spora at Samaru, Northern Nigeria, *Transactions of the British Mycological Society*, 49, 121-132, 1966.

Elbert, W., Taylor, P. E., Andreae, M. O., and Pöschl, U.: Contribution of fungi to primary biogenic aerosols in the atmosphere: wet and dry discharged spores, carbohydrates, and inorganic ions, *Atmospheric Chemistry and Physics*, 7, 4569-4588, 2007.

Elvira-Rendueles, B., Moreno, J., Garcia-Sanchez, A., Vergara, N., Martinez-Garcia, M. J., and Moreno-Grau, S.: Air-spore in Cartagena, Spain: Viable and non-viable sampling methods, *Ann Agr Env Med*, 20, 664-671, 2013.

Fang, Z., Ouyang, Z., Hu, L., Wang, X., Zheng, H., and Lin, X.: Culturable airborne fungi in outdoor environments in Beijing, China, *Sci Total Environ*, 350, 47-58, 2005.

Fišar, Z., Hýsek, J., and Binek, B.: Quantification of airborne microorganisms and investigation of their interactions with non-living particles, *International Journal of Biometeorology*, 34, 189-193, 1990.

Goncalves, F. L., Bauer, H., Cardoso, M. R., Pukinskas, S., Matos, D., Melhem, M., and Puxbaum, H.: Indoor and outdoor atmospheric fungal spores in the Sao Paulo metropolitan area (Brazil): species and numeric concentrations, *Int J Biometeorol*, 54, 347-355, 2010.

Griffin, D. W., Garrison, V. H., Herman, J. R., and Shinn, E. A.: African desert dust in the Caribbean atmosphere: Microbiology and public health, *Aerobiologia*, 17, 203-213, 2001.

Griffin, D. W., Kellogg, C. A., Garrison, V. H., Lisle, J. T., Borden, T. C., and Shinn, E. A.: Atmospheric microbiology in the northern Caribbean during African dust events, *Aerobiologia*, 19, 143-157, 2003.

Griffin, D. W., Kubilay, N., Koçak, M., Gray, M. A., Borden, T. C., and Shinn, E. A.: Airborne desert dust and aeromicrobiology over the Turkish Mediterranean coastline, *Atmospheric Environment*, 41, 4050-4062, 2007.

Hamilton, E. D.: STUDIES ON THE AIR SPORA1, *Allergy*, 13, 143-175, 1959.

Hasnain, S. M., Akhter, T., and Waqar, M. A.: Airborne and allergenic fungal spores of the Karachi environment and their correlation with meteorological factors, *J Environ Monit*, 14, 1006-1013, 2012.

Herrero, A. D., Ruiz, S. S., Bustillo, M. G., and Morales, P. C.: Study of airborne fungal spores in Madrid, Spain, *Aerobiologia*, 22, 133-140, 2006.

- Ho, H.-M., Rao, C. Y., Hsu, H.-H., Chiu, Y.-H., Liu, C.-M., and Chao, H. J.: Characteristics and determinants of ambient fungal spores in Hualien, Taiwan, *Atmospheric Environment*, 39, 5839-5850, 2005.
- Hu, Q. X., Xu, X. Z., Chen, M. L., Tong, Y. Y., and Che, F. X.: Study on atmospheric microbes in Shengyang III. The concentration and distribution of airborne fungal particles, *Microbiology* 21, 281-285, 1994.
- Jones, A. M. and Harrison, R. M.: The effects of meteorological factors on atmospheric bioaerosol concentrations--a review, *Sci Total Environ*, 326, 151-180, 2004.
- Kalyoncu, F.: Relationship between airborne fungal allergens and meteorological factors in Manisa City, Turkey, *Environ Monit Assess*, 165, 553-558, 2010.
- Kasprzyk, I. and Worek, M.: Airborne fungal spores in urban and rural environments in Poland, *Aerobiologia*, 22, 169-176, 2006.
- Katial, R. K., Zhang, Y., Jones, R. H., and Dyer, P. D.: Atmospheric mold spore counts in relation to meteorological parameters, *International Journal of Biometeorology*, 41, 17-22, 1997.
- Kellogg, C. A., Griffin, D. W., Garrison, V. H., Peak, K. K., Royall, N., Smith, R. R., and Shinn, E. A.: Characterization of Aerosolized Bacteria and Fungi From Desert Dust Events in Mali, West Africa, *Aerobiologia*, 20, 99-110, 2004.
- Lau, A. P. S., Lee, A. K. Y., Chan, C. K., and Fang, M.: Ergosterol as a biomarker for the quantification of the fungal biomass in atmospheric aerosols, *Atmospheric Environment*, 40, 249-259, 2006.
- Levetin, E. and Dorsey, K.: Contribution of leaf surface fungi to the air spora, *Aerobiologia*, 22, 3-12, 2006.
- Mallo, A. C., Nitiu, D. S., and Gardella Sambeth, M. C.: Airborne fungal spore content in the atmosphere of the city of La Plata, Argentina, *Aerobiologia*, 27, 77-84, 2010.
- Marks, R., Kruczalok, K., Jankowska, K., and Michalska, M.: Bacteria and fungi in air over the Gulf of Gdansk and Baltic sea, *J Aerosol Sci*, 32, 237-250, 2001.
- Oliveira, M., Ribeiro, H., Delgado, J. L., and Abreu, I.: Seasonal and intradiurnal variation of allergenic fungal spores in urban and rural areas of the North of Portugal, *Aerobiologia*, 25, 85-98, 2009.
- Pady, S. M.: Quantitative Studies of Fungus Spores in the Air, *Mycologia*, 49, 339-353, 1957.
- Pyrrri, I. and Kapsanaki-Gotsi, E.: Evaluation of the fungal aerosol in Athens, Greece, based on spore analysis, *Aerobiologia*, 31, 179-190, 2015.
- Rodríguez-Rajo, F. J., Iglesias, I., and Jato, V.: Variation assessment of airborne *Alternaria* and *Cladosporium* spores at different bioclimatical conditions, *Mycological Research*, 109, 497-507, 2005.
- Rosas, I., Escamilla, B., Calderon, C., and Mosiño, P.: The daily variations of airborne fungal spores in Mexico City, *Aerobiologia*, 6, 153, 1990.
- Sabariego, S., Díaz De La Guardia, C., and Alba, F.: The effect of meteorological factors on the daily variation of airborne fungal spores in Granada (southern Spain), *International Journal of Biometeorology*, 44, 1-5, 2000.
- Şakiyan, N. and Inceoğlu, Ö.: Atmospheric concentrations of *Cladosporium* Link and *Alternaria* Nées spores in Ankara and the effects of meteorological factors, *Turkish Journal of Botany*, 27, 77-81, 2003.
- Winiwarter, W., Bauer, H., Caseiro, A., and Puxbaum, H.: Quantifying emissions of primary biological aerosol particle mass in Europe, *Atmospheric Environment*, 43, 1403-1409, 2009.
- Wu, P. C., Tsai, J. C., Li, F. C., Lung, S. C., and Su, H. J.: Increased levels of ambient fungal spores in Taiwan are associated with dust events from China, *Atmospheric Environment*, 38, 4879-4886, 2004.
- Wu, Y.-H., Chan, C.-C., Rao, C. Y., Lee, C.-T., Hsu, H.-H., Chiu, Y.-H., and Chao, H. J.: Characteristics, determinants, and spatial variations of ambient fungal levels in the subtropical Taipei metropolis, *Atmospheric Environment*, 41, 2500-2509, 2007.
- Zhai, J. H., Cui, H., Chen, M. L., Xu, X. Z., Su, Z. H., and Hu, Q. X.: Analysis and identification of atmospheric fungi in Beijing and Nanjing, China, *China Public Health* 16, 1026-1027, 2000.
